# Supplementary material
Source: PubMed Central journal article supplement (PMC6583023)
Supplement: jamapediatr-172-1126-s002.pdf [file jamapediatr-172-1126-s002.pdf]

## Supplementary Online Content

Keim SA, Boone KM, Klebanoff MA, et al. Effect of docosahexaenoic acid supplementation vs placebo on developmental outcomes of toddlers born preterm: a randomized clinical trial. *JAMA Pediatr*. Published online October 22, 2018. doi:10.1001/jamapediatrics.2018.3082

**eTable.** Change from Baseline to Trial Completion in Developmental Outcomes, Subgroup Results, Omega Tots Trial (n=377), 2012-2017

This supplementary material has been provided by the authors to give readers additional information about their work.

**eTable.** Change from Baseline to Trial Completion in Developmental Outcomes, Subgroup Results, Omega Tots Trial (n=377), 2012-2017

| Outcomes                        | DHA+AA/p<br>lacebo,<br>No. at<br>baseline | Baseline score<br>mean (SD) |              | DHA+AA/p<br>lacebo,<br>No. at end<br>of trial | Score at end of trial mean<br>(SD) |             | Mean change (SD) |             | Difference<br>in Change <sup>b</sup> | 95% CI for<br>Difference | ANCOVA<br>effect size | p-<br>value |
|---------------------------------|-------------------------------------------|-----------------------------|--------------|-----------------------------------------------|------------------------------------|-------------|------------------|-------------|--------------------------------------|--------------------------|-----------------------|-------------|
|                                 |                                           |                             |              |                                               |                                    |             |                  |             |                                      |                          |                       |             |
| <b>Cognitive composite</b>      |                                           |                             |              |                                               |                                    |             |                  |             |                                      |                          |                       |             |
| Income ≤\$35,000                | 84/89                                     | 94.9 (15.2)                 | 101.1 (11.6) | 68/78                                         | 95.1 (13.1)                        | 96.5 (10.4) | -0.4 (12.9)      | -4.7 (13.4) | 0.9                                  | -2.6, 4.4                | 0.09                  | 0.60        |
| >\$35,000                       | 103/95                                    | 103.5 (11.5)                | 101.3 (11.0) | 101/87                                        | 99.6 (10.5)                        | 98.7 (11.9) | -4.1 (13.5)      | -2.7 (11.2) | -0.2                                 | -3.3, 2.9                | -0.01                 | 0.89        |
| Child sex – female              | 83/98                                     | 99.6 (15.0)                 | 100.9 (12.3) | 74/89                                         | 99.0 (12.7)                        | 97.3 (10.7) | -1.6 (13.6)      | -3.4 (12.3) | 1.6                                  | -1.6, 4.9                | 0.18                  | 0.32        |
| Male                            | 105/90                                    | 99.8 (13.1)                 | 101.8 (10.5) | 95/80                                         | 96.8 (11.0)                        | 98.2 (12.4) | -3.4 (13.2)      | -4.0 (12.1) | 0.0                                  | -3.2, 3.2                | -0.05                 | 0.99        |
| Birthweight <1250g              | 44/36                                     | 93.8 (16.3)                 | 98.1 (13.6)  | 40/34                                         | 93.0 (12.8)                        | 94.1 (10.5) | -2.4 (13.8)      | -4.0 (14.0) | -0.1                                 | -5.0, 4.9                | -0.01                 | 0.97        |
| ≥1250g                          | 143/152                                   | 101.5 (12.7)                | 102.1 (10.7) | 128/135                                       | 99.4 (11.0)                        | 98.6 (11.6) | -2.6 (13.3)      | -3.7 (11.7) | 0.9                                  | -1.7, 3.4                | 0.08                  | 0.51        |
| <b>Language composite</b>       |                                           |                             |              |                                               |                                    |             |                  |             |                                      |                          |                       |             |
| Income ≤\$35,000                | 84/89                                     | 90.2 (12.9)                 | 92.5 (10.8)  | 68/78                                         | 90.3 (13.7)                        | 90.8 (11.8) | -0.4 (13.4)      | -1.1 (12.3) | 0.1                                  | -3.6, 3.8                | 0.01                  | 0.95        |
| >\$35,000                       | 102/95                                    | 94.3 (11.3)                 | 94.0 (13.1)  | 101/87                                        | 94.0 (11.0)                        | 95.5 (13.5) | -0.6 (11.1)      | 1.5 (12.8)  | -2.0                                 | -5.0, 1.1                | -0.17                 | 0.21        |
| Child sex – female              | 82/98                                     | 93.5 (13.0)                 | 93.9 (13.3)  | 74/89                                         | 94.8 (13.9)                        | 94.2 (13.9) | 0.9 (12.2)       | 0.5 (13.9)  | 0.2                                  | -3.4, 3.9                | 0.04                  | 0.90        |
| Male                            | 105/90                                    | 91.7 (11.4)                 | 92.4 (10.5)  | 95/80                                         | 90.8 (10.7)                        | 92.1 (12.9) | -1.6 (11.8)      | -0.1 (11.0) | -1.2                                 | -4.3, 1.9                | -0.14                 | 0.45        |
| Birthweight <1250g <sup>c</sup> | 43/36                                     | 89.3 (14.7)                 | 92.6 (13.7)  | 40/34                                         | 88.5 (14.0)                        | 94.1 (12.4) | -2.2 (14.3)      | 1.1 (13.4)  | -4.4                                 | -9.9, 1.1                | -0.39                 | 0.12        |
| ≥1250g                          | 143/152                                   | 93.6 (11.2)                 | 93.3 (11.7)  | 128/135                                       | 93.8 (11.5)                        | 93.0 (13.4) | -0.0 (11.3)      | 0.0 (12.5)  | 0.3                                  | -2.3, 2.9                | 0.03                  | 0.82        |
| <b>Motor composite</b>          |                                           |                             |              |                                               |                                    |             |                  |             |                                      |                          |                       |             |
| Income ≤\$35,000 <sup>d</sup>   | 84/89                                     | 92.6 (14.5)                 | 96.0 (10.8)  | 68/78                                         | 94.1 (13.5)                        | 97.1 (10.4) | 0.4 (11.2)       | 1.2 (10.8)  | -1.7                                 | -4.9, 1.5                | -0.19                 | 0.29        |
| >\$35,000                       | 102/95                                    | 98.9 (12.6)                 | 96.5 (11.5)  | 100/87                                        | 97.8 (8.4)                         | 94.9 (14.2) | -1.2 (13.4)      | -1.8 (14.4) | 2.0                                  | -1.2, 5.3                | 0.21                  | 0.21        |
| Child sex – female              | 82/98                                     | 97.2 (13.9)                 | 95.6 (11.4)  | 73/89                                         | 97.3 (10.6)                        | 96.6 (11.2) | -0.9 (12.4)      | 0.7 (11.1)  | -0.4                                 | -3.3, 2.6                | -0.02                 | 0.81        |
| Male                            | 105/90                                    | 95.2 (13.7)                 | 97.0 (10.8)  | 95/80                                         | 95.5 (11.0)                        | 95.2 (13.9) | -0.3 (12.7)      | -1.6 (14.2) | 1.4                                  | -1.9, 4.8                | 0.06                  | 0.40        |
| Birthweight <1250g              | 43/36                                     | 90.2 (17.3)                 | 92.5 (12.7)  | 40/34                                         | 92.8 (14.4)                        | 95.1 (11.4) | 0.8 (13.1)       | 2.5 (7.9)   | -0.9                                 | -5.1, 3.3                | -0.20                 | 0.66        |
| ≥1250g                          | 143/152                                   | 97.8 (12.1)                 | 97.2 (10.6)  | 127/135                                       | 97.4 (9.3)                         | 96.2 (12.8) | -1.0 (12.4)      | -1.1 (13.6) | 0.8                                  | -1.8, 3.4                | 0.08                  | 0.54        |
| <b>Effortful control</b>        |                                           |                             |              |                                               |                                    |             |                  |             |                                      |                          |                       |             |
| Income ≤\$35,000 <sup>e</sup>   | 85/88                                     | 5.2 (0.7)                   | 5.4 (0.8)    | 64/75                                         | 4.5 (0.8)                          | 4.6 (0.8)   | -0.7 (0.9)       | -0.7 (0.8)  | 0.0                                  | -0.3, 0.2                | -0.03                 | 0.85        |
| >\$35,000                       | 103/95                                    | 5.3 (0.7)                   | 5.1 (0.8)    | 96/84                                         | 4.6 (0.7)                          | 4.7 (0.8)   | -0.7 (0.7)       | -0.3 (0.7)  | -0.3                                 | -0.4, -0.1               | -0.37                 | 0.01        |
| Child sex – female              | 83/97                                     | 5.4 (0.7)                   | 5.4 (0.8)    | 70/87                                         | 4.8 (0.8)                          | 4.8 (0.8)   | -0.6 (0.8)       | -0.6 (0.8)  | -0.1                                 | -0.3, 0.2                | -0.05                 | 0.57        |
| Male                            | 105/88                                    | 5.1 (0.7)                   | 5.0 (0.7)    | 90/76                                         | 4.4 (0.7)                          | 4.5 (0.8)   | -0.7 (0.8)       | -0.5 (0.8)  | -0.1                                 | -0.4, 0.1                | -0.21                 | 0.20        |
| Birthweight <1250g              | 45/36                                     | 5.2 (0.8)                   | 5.3 (0.8)    | 39/32                                         | 4.5 (0.9)                          | 4.6 (0.9)   | -0.6 (0.8)       | -0.7 (0.9)  | -0.1                                 | -0.4, 0.3                | -0.04                 | 0.72        |
| ≥1250g                          | 142/149                                   | 5.3 (0.7)                   | 5.2 (0.8)    | 120/131                                       | 4.6 (0.7)                          | 4.7 (0.8)   | -0.7 (0.8)       | -0.5 (0.8)  | -0.1                                 | -0.3, 0.1                | -0.18                 | 0.17        |

| Outcomes                        | DHA+AA/p<br>lacebo,<br>No. at<br>baseline | Baseline score<br>mean (SD) |           | DHA+AA/p<br>lacebo,<br>No. at end<br>of trial | Score at end of trial mean<br>(SD) |           | Mean change (SD) |           | Difference<br>in Change <sup>b</sup> | 95% CI for<br>Difference | ANCOVA<br>effect size | p-<br>value |
|---------------------------------|-------------------------------------------|-----------------------------|-----------|-----------------------------------------------|------------------------------------|-----------|------------------|-----------|--------------------------------------|--------------------------|-----------------------|-------------|
|                                 |                                           |                             |           |                                               |                                    |           |                  |           |                                      |                          |                       |             |
| <b>Activity level</b>           |                                           |                             |           |                                               |                                    |           |                  |           |                                      |                          |                       |             |
| Income ≤\$35,000                | 85/89                                     | 4.9 (1.3)                   | 4.9 (1.3) | 63/75                                         | 5.4 (1.2)                          | 5.6 (1.2) | 0.6 (1.8)        | 0.8 (1.6) | -0.1                                 | -0.5, 0.4                | -0.12                 | 0.80        |
| >\$35,000                       | 103/95                                    | 4.7 (1.2)                   | 4.9 (1.0) | 96/84                                         | 5.3 (1.0)                          | 5.2 (1.0) | 0.6 (1.3)        | 0.3 (1.4) | 0.1                                  | -0.2, 0.5                | 0.13                  | 0.37        |
| Child sex – female <sup>f</sup> | 83/97                                     | 4.7 (1.3)                   | 4.8 (1.2) | 70/87                                         | 5.5 (1.0)                          | 5.3 (1.1) | 0.8 (1.3)        | 0.6 (1.5) | 0.3                                  | -0.1, 0.6                | 0.21                  | 0.16        |
| Male                            | 105/89                                    | 4.9 (1.2)                   | 5.0 (1.1) | 89/76                                         | 5.3 (1.2)                          | 5.5 (1.1) | 0.4 (1.6)        | 0.5 (1.5) | -0.2                                 | -0.6, 0.2                | -0.18                 | 0.26        |
| Birthweight - <1250g            | 45/36                                     | 4.9 (1.2)                   | 4.9 (1.1) | 38/32                                         | 5.3 (1.2)                          | 5.3 (1.0) | 0.6 (1.5)        | 0.4 (1.5) | 0.1                                  | -0.5, 0.7                | 0.06                  | 0.72        |
| ≥1250g                          | 142/150                                   | 4.8 (1.2)                   | 4.9 (1.2) | 120/131                                       | 5.4 (1.1)                          | 5.4 (1.2) | 0.6 (1.5)        | 0.5 (1.5) | 0.0                                  | -0.3, 0.3                | 0.01                  | 0.90        |

<sup>a</sup> One child's baseline Bayley-III assessment was deemed invalid.

<sup>b</sup> Difference in change column is based on mixed effects model (analogous to ANCOVA) using maximum likelihood to account for missing data (39 children did not participate in the last trial visit) and thus may differ from the results of the raw summary statistics presented for the within-group mean change and standard deviation (SD). Positive numbers indicate the effect tended to favor DHA even if not statistically significant.

<sup>c</sup> Interaction  $P=0.12$ .

<sup>d</sup> Interaction  $P=0.10$ .

<sup>e</sup> Interaction  $P=0.17$ .

<sup>f</sup> Interaction  $P=0.07$ .

Missing data: income for 5 participants, birthweight for 1 participant.
